*mSphere*: Tilston-Lunel *et al.*, submitted

1 **Sustained replication of synthetic canine distemper virus defective genomes *in vitro* and**  
2 ***in vivo***

3

4 Natasha L. Tilston-Lunel<sup>a,b,c</sup>, Stephen R. Welch<sup>d</sup>, Sham Nambulli<sup>a,b,c</sup>, Rory D. de Vries<sup>e</sup>, Gregory  
5 W Ho<sup>a,b,c</sup>, David Wentworth<sup>f</sup>, Reed Shabman<sup>f</sup>, Stuart T. Nichol<sup>d</sup>, Christina F. Spiropoulou<sup>d</sup>, Rik  
6 L. de Swart<sup>e</sup>, Linda J. Rennick<sup>a,b,c</sup> and W. Paul Duprex<sup>a,b,c</sup>

7

8 <sup>a</sup>Center for Vaccine Research and <sup>b</sup>Department of Microbiology and Molecular Genetics,  
9 University of Pittsburgh School of Medicine, Pittsburgh, PA 15261, USA

10 <sup>c</sup>Department of Microbiology, Boston University School of Medicine, Boston, MA 02118, USA

11 <sup>d</sup>Viral Special Pathogens Branch, Centers for Disease Control and Prevention, Atlanta, GA 30333  
12 USA

13 <sup>e</sup>Department of Viroscience, Erasmus MC, University Medical Centre Rotterdam, Rotterdam, The  
14 Netherlands

15 <sup>f</sup>J Craig Venter Institute, Rockville, MD 20850

16

17

18 Address for correspondence to W. Paul Duprex, [pduprex@pitt.edu](mailto:pduprex@pitt.edu)

*mSphere*: Tilston-Lunel *et al.*, submitted

## 19 **Abstract**

20

21 Defective interfering (DI) genomes restrict viral replication and induce type-I interferon. Since DI  
22 genomes have been proposed as vaccine adjuvants or therapeutic antiviral agents, it is important  
23 to understand their generation, delineate their mechanism of action, develop robust production  
24 capacities, assess their safety and *in vivo* longevity and determine their long-term effects. To  
25 address this, we generated a recombinant (r) canine distemper virus (CDV) from an entirely  
26 synthetic molecular clone designed using the genomic sequence from a clinical isolate obtained  
27 from a free-ranging raccoon with distemper. rCDV was serially passaged *in vitro* to identify DI  
28 genomes that naturally arise during rCDV replication. Defective genomes were identified by  
29 Sanger and next-generation sequencing techniques and predominant genomes were  
30 synthetically generated and cloned into T7-driven plasmids. Fully encapsidated DI particles (DIPs)  
31 were then generated using a rationally attenuated rCDV as a producer virus to drive DI genome  
32 replication. We demonstrate these DIPs interfere with rCDV replication in a dose-dependent  
33 manner *in vitro*. Finally, we show sustained replication of a fluorescent DIP in experimentally  
34 infected ferrets over a period of 14 days. Most importantly, DIPs were isolated from the lymphoid  
35 tissues which are a major site of CDV replication. Our established pipeline for detection,  
36 generation and assaying DIPs is transferable to highly pathogenic paramyxoviruses and will allow  
37 qualitative and quantitative assessment of the therapeutic effects of DIP administration on disease  
38 outcome.

39

## 40 **Importance**

41

42 Defective interfering (DI) genomes have long been considered inconvenient artifacts that  
43 suppressed viral replication *in vitro*. However, advances in sequencing technologies have led to

*mSphere*: Tilston-Lunel *et al.*, submitted

44 DI genomes being identified in clinical samples, implicating them in disease progression and  
45 outcome. It has been suggested that DI genomes could be harnessed therapeutically. Negative  
46 strand RNA virus research has provided a rich pool of natural DI genomes over many years and  
47 they are probably the best understood *in vitro*. Here, we demonstrate identification, synthesis,  
48 production and experimental inoculation of novel CDV DI genomes in highly susceptible ferrets.  
49 These results provide important evidence that rationally designed and packaged DI genomes can  
50 survive the course of a wild-type virus infection.

51

52 **Keywords:** canine distemper virus, defective interfering viral particles, defective interfering  
53 genomes, defective genomes, next-generation sequencing, single-step attenuation, vaccines,  
54 ferret model

*mSphere*: Tilston-Lunel *et al.*, submitted

## 55 Introduction

56

57 Negative-sense (-) RNA viruses are prone to replication errors due to their low fidelity RNA-  
58 dependent RNA polymerase (RdRp). This results in a rich population of genetic variants, which  
59 may include subpopulations of defective interfering (DI) genomes. DI genomes are defined by  
60 their ability to disrupt standard genome replication, either by directly competing for resources or  
61 indirectly by triggering the interferon (IFN) pathway<sup>1-5</sup>. The most common and well-defined DI  
62 genomes include the deletion and copyback types<sup>2</sup>. During standard genome replication, the  
63 incoming (-) RNA is encapsidated by the viral nucleocapsid protein and contains a single genomic  
64 promoter (GP). RdRp binds to this GP and synthesizes complementary (+) RNA intermediates or  
65 antigenomes. The antigenomic promoter (AGP) present on the antigenomic RNA allows RdRp to  
66 bind and synthesize novel (-) RNA genomes<sup>6</sup>. However, when the RdRp prematurely dissociates  
67 from either its (-) or (+) RNA template it can reinitiate replication by binding (a) upstream of the  
68 same template and generate deletion genomes, or (b) onto the nascent complementary strand  
69 and generate ambisense genomes known as copybacks. Deletion and copyback genomes that  
70 retain functional replication and packaging signals can be maintained alongside the standard  
71 genome by utilizing it as a source for missing proteins. This association results in a predator-prey  
72 type scenario which can be visualized as cyclic titer patterns during *in vitro* passage  
73 experiments<sup>2,7</sup>.

74

75 The ability of DI genomes to disrupt virus replication has led to propositions for their use as  
76 vaccine adjuvants or antivirals<sup>8-10</sup>. Various studies using vesicular stomatitis virus (VSV)<sup>11,12</sup>,  
77 Sendai virus (SeV)<sup>13</sup>, human respiratory syncytial virus (HRSV)<sup>14,15</sup> and influenza virus<sup>16-18</sup> have  
78 demonstrated reduced standard viral yields both *in vitro* and *in vivo* when DI genomes are present.  
79 DI genomes are highly immunostimulatory in nature and demonstrate preferential interaction with

*mSphere*: Tilston-Lunel *et al.*, submitted

80 RIG-I over the standard genome<sup>19</sup>. Copyback DI genomes specifically have been shown to  
81 stimulate production of several proinflammatory cytokines and chemokines, and enhance  
82 dendritic cell maturation<sup>14,20–22</sup>. In humans, DI genomes detected in HRSV positive samples  
83 correlate with increased expression levels of antiviral genes<sup>23</sup>, while their absence in influenza A  
84 virus (IAV) infected patients correlate with disease severity<sup>24</sup>. The antiviral activity of DI genomes  
85 has been assessed using both unencapsidated “naked” DI RNA, as well as DI-RNA packaged in  
86 a ribonucleoprotein complex, defined as a DI particle (DIP). In immunization studies, inactivated  
87 viruses adjuvanted with DI RNAs score better than controls with poly-IC or alum, by inducing type-  
88 I humoral and cellular immune responses and enhancing antibody levels<sup>22,25</sup>. This type-I IFN  
89 inducing ability allows DIPs to also protect against heterologous virus infection, as seen with  
90 influenza A virus (IAV) DIP 244/PR8 which protects mice from unrelated pneumonia virus<sup>26</sup>.  
91 However, for a DIP-based therapeutic to work dosage is vital. For instance, mice treated with 400  
92 hemagglutinating units (HAU; 1.2 µg) of IAV DIP 244/PR8 one week prior to a second IAV  
93 challenge were completely protected, whereas mice that were treated with a ten-fold higher dose  
94 did not have the same outcome<sup>16</sup>. These results illustrate how achieving a potent dosage optimal  
95 to both outcompete standard virus replication and to induce an immune response is complex.

96

97 Another challenge when considering DIPs is their production. DIPs require appropriate packaging  
98 to allow successful delivery of the DI genome of sufficient potency to the right target cells. DI  
99 genomes by their very nature are replication-deficient and thus need a replication-competent  
100 helper virus to drive their production. The inherent enigma here is that the DI genome will also  
101 interfere with replication of the helper virus, thereby impeding a straightforward production  
102 process. The second challenge is that the DIPs need to then be purified from the helper virus.  
103 Certain viruses like SeV<sup>13</sup>, VSV<sup>11,12</sup> and HRSV<sup>27</sup> exhibit a virion size difference depending on  
104 whether the full-length or DI genome is packaged. This allows DIPs to be purified via density

*mSphere*: Tilston-Lunel *et al.*, submitted

105 ultracentrifugation. This size difference is not seen in all viruses, nor would separation on basis  
106 of size be advisable for highly pathogenic viruses. Another option is ultraviolet (UV) irradiation,  
107 which is used to exploit the difference in genome length between the helper virus and DIP. At a  
108 precise dosage the much larger full-length genome can be selectively inactivated whilst leaving  
109 the smaller DI genome intact<sup>28</sup>. However, practically this is not a viable option when dealing with  
110 highly pathogenic BSL-4 pathogens, for example Nipah virus. Recently, a packaging cell-line  
111 expressing the missing IAV protein PB1 demonstrated successful production of pure IAV DIP  
112 244/PR8 without the need for a helper virus<sup>29</sup>. This is an ideal scenario, as establishing such  
113 packaging cell-lines expressing the repertoire of proteins required for many of the other viral DIPs  
114 may not be straightforward.

115

116 In this study, we investigated a novel, rationally attenuated, recombinant (r) canine distemper  
117 virus (CDV) as a “producer virus” (i.e., helper virus), in order to generate rCDV DIPs. CDV is a  
118 morbillivirus in the paramyxovirus family, and similar to many other members it requires a  
119 polyhexameric genome length for replication<sup>30</sup>. Therefore, we focused on rule-of-six compliant  
120 rCDV DI genomes that were generated naturally (n) during *in vitro* passages. We developed  
121 assays to generate these rCDV DIPs using our producer virus system and assessed the DIPs for  
122 interference activity. Most importantly, we demonstrate that a synthetically (s) engineered  
123 fluorescent defective genome can successfully replicate and be maintained in ferrets during the  
124 course of a natural rCDV infection. CDV is a tractable biosafety level (BSL)-2 pathogen and  
125 ferrets are a naturally susceptible animal model, making our system a good resource for  
126 developing highly complex assay systems such as the ones required for DIPs.

*mSphere*: Tilston-Lunel *et al.*, submitted

127 **Results**

128 **A single dominant defective viral genome generated early during rCDV<sup>RI</sup> *in vitro* infection**  
129 **is consistently maintained across subsequent passages**

130

131 To identify predominant DI genomes arising naturally during a CDV infection, we serially  
132 passaged four different versions of recombinant (r) CDV strain Rhode Island (rCDV<sup>RI</sup>) 10 times in  
133 Vero cells modified to express canine (c) CD150 (Vero-cCD150). First, a plasmid encoding the  
134 full-length rCDV<sup>RI</sup> antigenome was modified to encode rCDVs expressing reporter proteins  
135 Venus, monomeric blue fluorescent protein (TagBFP), dTomato fluorescent protein (dTom) or  
136 *Gaussia luciferase* (Gluc), from an additional transcription unit (ATU) at position six in the  
137 genome. Viruses rCDV<sup>RI</sup>Venus(6), rCDV<sup>RI</sup>TagBFP(6), rCDV<sup>RI</sup>dTom(6) and rCDV<sup>RI</sup>Gluc(6) were  
138 generated in Vero-cCD150. Here, cells were first infected with a recombinant vaccinia virus  
139 expressing T7 polymerase (MVA-T7) and then transfected with expression plasmids expressing  
140 the nucleocapsid (N), phospho- (P) and large (L) proteins along with the full-length plasmids  
141 pCDV<sup>RI</sup>Venus(6), pCDV<sup>RI</sup>TagBFP(6), pCDV<sup>RI</sup>dTom(6) or pCDV<sup>RI</sup>Gluc(6). Virus was rescued 5 –  
142 7 days post-transfection (d.p.t.), and a clonal population was generated by plaque picking  
143 syncytia.

144

145 In the first experiment, rCDV<sup>RI</sup>Venus(6) was passaged once (P1) at MOI 0.05 in Vero-cCD150  
146 cells. This stock was then serially passaged nine times, in triplicate (A, B and C) (Figure 1A). We  
147 found that passages A, B and C followed a highly similar viral titer pattern over the 10 passages  
148 (Figure 1B), which we expect is due to identical DI genomes in all three experiments. Using a  
149 copyback genome-specific RT/PCR assay <sup>31</sup> (Table 1, priCDV<sup>RI</sup>-A1R and priCDV<sup>RI</sup>-A2R) we  
150 amplified a 720 nt copyback genome in passage B at P10 (Figure 1C). To determine if a similar  
151 outcome would arise when repeated, rCDV<sup>RI</sup>TagBFP(6), rCDV<sup>RI</sup>dTom(6) and rCDV<sup>RI</sup>Gluc(6) were

*mSphere*: Tilston-Lunel *et al.*, submitted

152 serially passaged under similar conditions to rCDV<sup>RI</sup>Venus(6) (Figure 1D). This time, we observed  
153 a different titer pattern for each virus (Figure 1E). rCDV<sup>RI</sup>TagBFP(6) and rCDV<sup>RI</sup>Gluc(6) titers  
154 crashed at passage 3, with rCDV<sup>RI</sup>Gluc(6) crashing also at P6 and P10. Viral titers for  
155 rCDV<sup>RI</sup>dTom(6) on the other hand appeared to remain relatively constant throughout the 10  
156 passages. Here, RT/PCR results revealed a unique copyback genome for each virus, 630 nt in  
157 rCDV<sup>RI</sup>TagBFP(6), 1092 nt in rCDV<sup>RI</sup>dTom(6) and 690 nt in rCDV<sup>RI</sup>Gluc(6) (Figure 1F). Genome  
158 lengths of the copyback sequences identified by RT/PCR from these passage experiments are  
159 compliant with the rule-of-six requirement for morbilliviruses.

160

161 Next, all passaged samples were sequenced using the Illumina MiSeq platform. Datasets were  
162 first quality filtered and aligned to their respective reference genome using CLC Genomics  
163 Workbench. Datasets were then examined to identify chimeric reads, which either consist of  
164 deletion junctions or head-to-tail rearrangements of the genome. These chimeric points were  
165 subsequently mapped onto full-length reference genomes, and break and reinitiation points (i.e.,  
166 the sequence where the RdRp dissociates from the RNA template and the sequence where the  
167 RdRp reinitiates replication) were identified. In the final dataset, to help eliminate false positives  
168 that may have passed through the initial screening, we applied a read cutoff value of 1. Using  
169 this dataset, the frequencies of every defective genome identified across the passages for each  
170 virus were plotted. This revealed that each passage contained one predominant defective  
171 genome (Figure 2A and B). Mapping information identified these copyback genomes identical to  
172 those amplified by RT/PCR, hence providing confidence in our chimeric Illumina dataset.

173

174 In the first experiment using rCDV<sup>RI</sup>Venus(6), a 720 nt genome was identified at P1, and even  
175 though passage A, B and C were independent from P2 onwards, the 720 nt genome remained  
176 predominant throughout the nine passages (Figure 2A). In the second experiment, a 630 nt



*mSphere*: Tilston-Lunel *et al.*, submitted

177 genome was identified at P2 in rCDV<sup>RI</sup>TagBFP(6) and remained predominant till P10 (Figure 2B).  
178 Whether this genome formed at P1, but was just undetected is unclear. In rCDV<sup>RI</sup>dTom(6), no  
179 defective genomes were detected at P1, from P2 onwards a 1092 nt copyback genome became  
180 predominant. With rCDV<sup>RI</sup>Gluc(6) a 690 nt copyback genome prevailed from P1 up until P10  
181 (Figure 2B). A ratio of the 720 nt, 630 nt, 690 nt and 1092 nt copyback genome sequencing reads  
182 was calculated for each passage based on when they were first detected. Overlaying these  
183 numbers onto their respective parental virus titers demonstrated an inverse correlation in cyclic  
184 patterns of DI genome reads and virus titer (Figure 2C and D). This was especially convincing  
185 for rCDV<sup>RI</sup>Gluc(6) (Figure 2D).

186

187 In brief, we identified 15 rule-of-six compliant rCDV copyback genomes from the serial passages  
188 and an additional six during the course of this study (Table 2). We found only four copyback  
189 genomes that would have formed towards the GP end of the genome (i.e., GP copybacks).  
190 Breakpoints for these GP copyback genomes fell in the N and F gene, and were not rule-of-six  
191 compliant. Plotting all AG copyback break and reinitiation points, whether or not these genomes  
192 were rule-of-six compliant, we found that breakpoints in our dataset typically fell between nts  
193 13,371 and 15,624 of the rCDV<sup>RI</sup> genome, and clustered between nt 15,250 and 15,450 (L gene).  
194 Reinitiation points for these genomes as expected occurred much closer to the genome end,  
195 between nt 15,300 and 15,683 (Figure 3A). We found two snap-back genomes (with identical  
196 breakpoint and reinitiation sites), one of which was rule-of-six compliant (2124 nt, Table 2). In  
197 terms of defective genome uniqueness, we found more rule-of-six deletion genomes than  
198 copyback genomes (Figure 3B). However, a majority of these fell below our read cut-off threshold  
199 of 1. It is unclear at this time whether these genomes are sequencing artifacts or true deletion  
200 sequences that were simply unable to compete with the predominant copyback genome.

201

*mSphere*: Tilston-Lunel *et al.*, submitted

## 202 **Generation of DIPs using a rationally attenuated rCDV<sup>RI</sup> as a producer virus**

203

204 To produce DIPs in a non-pathogenic background, we generated an attenuated rCDV<sup>RI</sup>Venus(6),  
205 using an approach as described in our previous work<sup>32,33</sup>. We predicted the second variable hinge  
206 in CDV<sup>RI</sup> L gene to be between nucleotides 14,111 and 14,180. We mutated the genome positions  
207 14,826-27 and 14,835-36 in plasmid pCDV<sup>RI</sup>Venus(6) from 'CT' to GG and AA, respectively. This  
208 created restriction sites *Msc* I and *Hpa* I, which were used to clone the open reading frame of  
209 enhanced green fluorescent protein (EGFP) into the L gene (Figure 4A). rCDV<sup>RI</sup>Venus(6)-LEGFP  
210 was rescued and plaque picked (P0) in Vero-cCD150 cells, with titers similar to rCDV<sup>RI</sup>Venus(6).  
211 This virus thus encoded both Venus (from an ATU) and EGFP (fused to the viral polymerase). In  
212 previous studies we have demonstrated that this fusion protein remains functional as a  
213 polymerase, but with reduced efficacy thus explaining the viral attenuation phenotype.

214

215 Next, we investigated whether a clonal population of DIPs can be produced using  
216 rCDV<sup>RI</sup>Venus(6)-LEGFP. We first constructed DI genome-expressing plasmids by inserting  
217 synthetic copyback (cb) DI genome sequences for nDI<sup>RI</sup>04cb, nDI<sup>RI</sup>07cb, nDI<sup>RI</sup>10cb and nDI<sup>RI</sup>11cb  
218 (Table 2) into a T7-driven plasmid backbone. We also constructed a deletion (del) genome  
219 (sDI<sup>RI</sup>LedTomTr) by placing the dTom sequence between the leader and trailer sequences of  
220 rCDV<sup>RI</sup> genome. To then generate DIPs, we transfected Vero-cCD150 cells (supplemented with  
221 T7 polymerase) with a DI-plasmid and CMV-driven helper plasmids expressing rCDV<sup>RI</sup> N, P and  
222 L proteins. Two d.p.t. these cells were superinfected with rCDV<sup>RI</sup>Venus(6)-LEGFP at an MOI  
223 0.001, and following an experimental setup described in Figure 4A stocks containing DIPs were  
224 produced.

225

*mSphere*: Tilston-Lunel *et al.*, submitted

226 To determine the defective genome population in rescued (P0) stocks, we passaged DIP  
227 nDI<sup>RI</sup>04cb an additional three times in Vero-cCD150 cells and sequenced them using our Illumina  
228 NGS pipeline. At P1 about 20% of the defective genome reads were non-rule-of-six copyback  
229 and deletion sequences, with only 1 sequencing read each (Figure 4B, left axis). These numbers  
230 decreased drastically at P2 and P3 leaving nDI<sup>RI</sup>04cb as the predominant sequence, although the  
231 overall number of reads in the samples also dropped (Figure 4B, right axis). This highlighted a  
232 production issue when using a producer virus, due to the competition between DI and full-length  
233 genome (Figure 4C). To solve this issue, we first quantified the genome copies of nDI<sup>RI</sup>04cb or  
234 sDI<sup>RI</sup>LedTomTr present in P1, and the number of full-length genome copies in our producer stock  
235 using a qRT/PCR assay (Table 1). We then empirically determined that a low DI:virus ratio  
236 (0.05:1) repeatedly generated between 10<sup>5</sup> - 10<sup>7</sup> copies/ $\mu$ l of DI genome (Figure 4D), providing a  
237 way to control DIP output.

238

### 239 **UV irradiation for targeted inactivation of producer virus**

240

241 To assess defective genome-specific effects without the confounding effects of the producer virus,  
242 we first tested various UV dosages that would sufficiently inactivate only the full-length genome.  
243 Briefly, producer virus samples were irradiated using a UV crosslinker at UV dosages between 0  
244 to 60 mJ/cm<sup>2</sup>, at 2 ml in a 6-well tray. By 40 mJ/cm<sup>2</sup> no infectious virus could be detected via  
245 TCID<sub>50</sub> (Figure 5A).

246

247 Next, we tested these UV dosages in our DIP stocks in order to determine if the DI genome  
248 remained active. Since an active full-length genome is required for defective genome replication,  
249 we superinfected Vero-cCD150 cells that were infected with a range of UV-treated DIP stocks.  
250 Here, we used rCDV<sup>RI</sup>TagBFP(6) as an 'activator virus' (blue syncytia, Figure 5B and C). We

*mSphere*: Tilston-Lunel *et al.*, submitted

251 found that the defective genome (red syncytia, Figure 5B) remained active even at 60 mJ/cm<sup>2</sup>. In  
252 the subsequent experiments we therefore chose 60 mJ/cm<sup>2</sup> for producer virus inactivation. For  
253 complete inactivation of DI-genome we used a high UV dose of 240(×8) mJ/cm<sup>2</sup>, as a single dose  
254 proved insufficient. Interestingly, we also found that defective genomes can remain inactive in  
255 cells for at least 3 days post infection until superinfected with an activator virus (Figure 5C).

256

257 Next, to confirm whether defective genome activation was specifically due to the activator virus  
258 and/or if other paramyxoviruses can replicate the defective genome, we infected Vero-cCD150  
259 cells with DIPs and then attempted to activate expression using CDV, measles virus (MV), mumps  
260 virus (MuV) or HRSV. Activation of a CDV defective genome occurred with CDV and MV, but not  
261 with MuV or HRSV (Figure 5D).

262

### 263 **rCDV<sup>RI</sup> DIP specific interference activity is dose dependent**

264

265 We tested four cbDIPs: nDI<sup>RI</sup>04cb, nDI<sup>RI</sup>07cb, nDI<sup>RI</sup>10cb and nDI<sup>RI</sup>11cb (Table 2), and  
266 sDI<sup>RI</sup>LedTomTr for their ability to interfere with rCDV<sup>RI</sup> replication *in vitro* using Vero-cCD150 cells  
267 which lack a fully functional IFN system. Vero-cCD150 cell monolayers infected with a 10-fold  
268 serial dilution of the DIP stocks demonstrated almost complete inhibition of rCDV<sup>RI</sup> infection at the  
269 highest DIP concentration (Figure 6A). Using cb DIP nDI<sup>RI</sup>04cb, we determined if inhibition was  
270 DIP-specific or an effect due to cytokines and/or cell debris. Here, DIPs were UV-inactivated at  
271 120 (×8) mJ/cm<sup>2</sup> to ensure complete DI genome inactivation. Next, Vero-cCD150 cells were  
272 infected with various ratios of rCDV<sup>RI</sup> and active DIPs or rCDV<sup>RI</sup> and inactivated DIPs. Ratios were  
273 based on genome copies determined using a qRT/PCR assay. We found a dose-dependent DIP-  
274 specific interference affect, in which a genome ratio of 10:000 DIP:1 rCDV<sup>RI</sup> was required to

*mSphere*: Tilston-Lunel *et al.*, submitted

275 completely inhibit virus replication in Vero-cCD150 cells (Figure 6B). Importantly, we observed  
276 no reduction in rCDV<sup>RI</sup> yield with the inactivated DIPs.

277

### 278 **rCDV<sup>RI</sup> DIPs replicate in appropriate cells in a ferret model**

279

280 To assess if DIP nDI<sup>RI</sup>04cb can replicate and be maintained during the course of infection in a  
281 natural host animal model. We first demonstrated that DIPs (delDIP expressing Venus) could  
282 successfully replicate in disease-relevant IFN-competent canine B-cell lymphoma cell line  
283 (CLBL-1) when co-infected with rCDV<sup>RI</sup>TagBFP(6) as an activator virus (Figure 7A). Next, four  
284 groups of three ferrets were infected with rCDV<sup>RI</sup>TagBFP(6) as an activator virus. Animals were  
285 either co-administered with nDI<sup>RI</sup>04cb or DMEM (control), or pre-administered with nDI<sup>RI</sup>04cb or  
286 sDI<sup>RI</sup>dTomdel04cb (nDI<sup>RI</sup>04cb variant expressing dTom). DIPs were pre-administered 6 hours  
287 prior to activator virus infection. All infections were carried out via the intra-tracheal (IT) route  
288 (Figure 7B). Animals were monitored over a 14-day period for clinical signs and symptoms, and  
289 blood samples were collected at 0 d.p.i. and then every 2 days. No weight loss was observed  
290 (Figure 7C) over the infection period. All animals had lymphopenia, (Figure 7D) which is typical  
291 in ferrets infected with CDV. White blood cells (WBC) were isolated from the blood samples and  
292 the percentage of TagBFP positive cells were determined by flow cytometry (Figure 7E), this was  
293 confirmed at the same time by virus isolation in Vero-cCD150 cells. rCDV<sup>RI</sup>TagBFP(6) was  
294 detected in WBC of all ferrets with a peak at 6 d.p.i. (Figure 7E). At necropsy, rCDV<sup>RI</sup>TagBFP(6)  
295 was also isolated from the lymph nodes of all animals. Importantly, we isolated sDI<sup>RI</sup>dTomdel04cb  
296 in two animals from WBC at 6 d.p.i. and lymph nodes at 14 d.p.i. (Figure 7F). Using a genome-  
297 specific and DI-specific qRT/PCR assay we detected low levels of DI genomes in the WBC and  
298 lymph nodes for both sDI<sup>RI</sup>dTomdel04cb (Figure 7G and H) and nDI<sup>RI</sup>04cb (Figure 7I and J).

299

*mSphere*: Tilston-Lunel *et al.*, submitted

## 300 **Discussion**

301

302 Viruses adapt quickly to their host environment and so it is crucial to minimize their passage *in*  
303 *vitro* if we are to obtain meaningful information. In the present study, we describe the  
304 establishment of a novel recombinant canine distemper virus strain Rhode Island (rCDV<sup>RI</sup>).  
305 rCDV<sup>RI</sup> is the first non-laboratory adapted rCDV, based on a currently circulating wild-type strain  
306 isolated from a raccoon on Rhode Island, USA in 2012. We propose that rCDV<sup>RI</sup> should replace  
307 all currently used laboratory-adapted rCDV strains such as Snyder-Hill and A75 in pathogenesis  
308 studies. The accessibility and affordability of sequencing and synthetic biology should now allow  
309 the use of field isolates of known provenance such as CDV<sup>RI</sup> to replace laboratory-adapted strains.

310

311 The overarching goal of this study was to assess the ability of a non-laboratory adapted CDV to  
312 generate DI genomes *in vitro* and whether these DI genomes could be maintained *in vivo* in a  
313 natural animal model. We used a combination of RT/PCR/Sanger sequencing and short-read  
314 Illumina sequencing to identify defective genomes in rCDV<sup>RI</sup>. We used a bioinformatics pipeline<sup>34</sup>  
315 to identify DI-junctions in the Illumina datasets, and found that all high frequency copyback DI-  
316 junctions that were identified matched those isolated by RT/PCR. Our results revealed that  
317 defective genomes are generated early during rCDV<sup>RI</sup> rescue and passage. Independently  
318 rescued rCDV<sup>RI</sup> stocks contained unique defective genomes, out of which one predominant  
319 copyback genome persisted alongside the full-length genome during serial passage. We were  
320 unable to detect any deletion genomes by RT/PCR, potentially due to their low abundance, as  
321 revealed in the Illumina dataset. However, it should be noted that frequency of a DI-junction does  
322 not reflect the true quantity of a genome in the sample. Further, as morbillivirus genomes are  
323 multiples of six, we expect only rule-of-six-compliant defective genomes as successfully  
324 competing with the full-length genome. All high frequency copyback DI genomes that we

*mSphere*: Tilston-Lunel *et al.*, submitted

325 identified were indeed multiples of six. Whereas recent data on HRSV suggested that DI-genome  
326 generation may be sequence-driven rather than a random process<sup>15</sup>, we did not find this to be the  
327 case in our studies on rCDV<sup>RI</sup>. Different viruses potentially have different processes for  
328 generating/regulating DI genomes, for instance deleting the C protein from some  
329 paramyxoviruses increases DI formation<sup>35-37</sup>.

330

331 Next, we combined the use of an attenuated rCDV<sup>RI</sup> as producer virus with selective UV-  
332 inactivation to address DIP production and purification. We successfully demonstrated that such  
333 DIPs can be maintained during the course of rCDV<sup>RI</sup> infection in ferrets. If DIPs are to be used  
334 therapeutically then obtaining an appropriate DIP dosage is essential. However, translating  
335 dosage from *in vitro* to *in vivo* can be challenging. Our *in vitro* dose-response assay for copyback  
336 DIP nDI<sup>RI</sup>04cb determined a DIP to virus ratio at about 10,000:1 (Figure 6B). However, infecting  
337 ferrets with a high dose of 70,000 DI genomes:1 virus genome proved inadequate to interfere with  
338 virus replication. From our experience using deletion DIP sDI<sup>RI</sup>LedTomTr, we find that DI genome  
339 copies do not necessarily translate to infectious DIP titers (unpublished data). Therefore, our true  
340 dose may have been well below that required for an *in vivo* system. Our *in vitro* assays using  
341 IFN-deficient Vero-cCD150 cells demonstrate that DIPs can inhibit wild-type virus generation.  
342 Nevertheless, we believe that any *in vivo* effect using these DIPs or any DIP-based therapy may  
343 ultimately be down to innate immune responses mounted by the host.

344

345 DIP production is a work in progress and will be an important hurdle to decipher for DIP-based  
346 therapeutics. We chose an attenuated producer virus approach for this study. rCDV<sup>RI</sup> producer  
347 virus was based on our previous work demonstrating that introduction of foreign sequences in the  
348 second variable hinge of the L protein sufficiently attenuates morbilliviruses<sup>32,33</sup>. As expected  
349 rCDV<sup>RI</sup>Venus(6)LEGFP was also attenuated in ferrets (unpublished data). This is important as

*mSphere*: Tilston-Lunel *et al.*, submitted

350 such a producer virus would not contribute to disease, thus making it possible to assess a  
351 potential interference effect of the DIP. DIPs generated with such a system will be properly  
352 packaged and delivered to the right target cells. Additionally, UV-inactivation of such a producer  
353 virus would no longer be a safety concern. However, obtaining the high DIP concentrations  
354 required using such a system is still a tedious task and any shift in balance results in reduced DIP  
355 titers.

356  
357 DIPs may well have a future as therapeutic interfering particles, but before we can safely make  
358 that transition, we need to consider the long-term effects of DIPs, such as their role in viral  
359 persistence<sup>38</sup>. Extensive longitudinal experiments in appropriate animal models would need to be  
360 carried out to address any safety issues. Although the DIPs in this study were (at our estimated  
361 ratio) unable to interfere with wild-type CDV replication, the study provides formal evidence for  
362 sustained DI genome replication *in vivo* and provides a valuable basis for future DIP work with (-  
363 )RNA viruses.

364

## 365 **Methods**

### 366 **Cell lines, plasmids and viruses**

367

368 Vero cells that stably express the canine receptor CD150 (Vero-cCD150) were grown in advanced  
369 Dulbecco's modified Eagle medium (DMEM; Gibco) supplemented with 10% (V/V) fetal bovine  
370 serum (HI FBS heat inactivated, Gibco) and GlutaMAX-I (Gibco)<sup>39</sup>. Canine B-cell lymphoma cell  
371 line CLBL-1<sup>40</sup> was grown in RPMI-1640 supplemented with 10% (V/V) FBS. All cells were grown  
372 at 37°C and 5% CO<sub>2</sub>.

373

374 CDV was isolated from ferret oral swabs and viral consensus sequences were obtained  
375 (Accession number KU666057). To construct a plasmid containing the full length genome we



*mSphere*: Tilston-Lunel *et al.*, submitted

376 obtained seven synthetic fragments with overlapping sequences and assembled them via Gibson  
377 Assembly (NEBuilder® HiFi DNA assembly, NEB). A subclone containing the reminder of the viral  
378 sequences and restriction sites required to clone in the fragments was generated in a modified  
379 pBluescript plasmid<sup>41</sup>. The Gibson assembled fragments were then cloned into the subclone  
380 generating pCDV<sup>RI</sup>.

381  
382 pCDV<sup>RI</sup> versions expressing reporter proteins Venus, dTom, TagBFP or Gluc were generated by  
383 placing the coding sequences as an additional transcription unit at the sixth position of the  
384 genome. Briefly, parental plasmid (pCDV<sup>RI</sup>) was linearized using restriction sites *Mse* I at genome  
385 position 8340 (H gene) and *Aat* II at genome position 10,696 (L gene), reporter genes (obtained  
386 as gBlock Gene Fragments from IDT) were then ligated into the linearized plasmid by Gibson  
387 Assembly (NEBuilder® HiFi DNA assembly, NEB). The phosphoprotein gene start and the  
388 hemagglutinin (H) glycoprotein gene end sequences were used as signal sequences for the  
389 reporter genes. pCDV<sup>RI</sup>Venus(6)-LEGFP was constructed from pCDV<sup>RI</sup>Venus(6). We used  
390 restriction site *Avr* II to linearize pCDV<sup>RI</sup>Venus(6) at genome positions 14,141 and 15,060. We  
391 then used a 1690 bp synthetic fragment (gBlock Gene Fragments from IDT) containing the  
392 digested L gene sequences and EGFP to be inserted by Gibson Assembly (NEBuilder HiFi DNA  
393 assembly, NEB). The gBlock contained mutations to replace nucleotides CT at rCDV<sup>RI</sup>Venus(6)  
394 genome positions 14,826-27 and 14,835-36 to GG and AA, respectively. These mutations create  
395 restriction sites *Msc* I and *Hpa* I in pCDV<sup>RI</sup>Venus(6)-LEGFP which allows EGFP to be swapped  
396 easily with other genes when needed.

397  
398 The expression plasmids encoding N, P and L protein sequences of CDV<sup>RI</sup> were generated by  
399 PCR amplifying the genes from pCDV<sup>RI</sup> and then ligating them into the eukaryotic expression

*mSphere*: Tilston-Lunel *et al.*, submitted

400 vector pCG<sup>42</sup> using *Asc* I and *Spe* I restriction sites to generate pCG-CDV<sup>RI</sup>N, pCG-CDV<sup>RI</sup>P, and  
401 pCG-CDV<sup>RI</sup>L.

402

403 Similar to the virus rescue plasmids, all defective genome expressing plasmids contained  
404 sequences for a T7 promoter, hammerhead ribozyme, defective genome, hepatitis delta virus  
405 ribozyme and a T7 terminator. Defective genomes from the T7 transcripts were designed to be in  
406 the negative sense orientation. First, a copyback genome core plasmid containing 22 nucleotides  
407 of trailer (AGP) and trailer complement sequences with a naturally formed *Eco* RV restriction site  
408 was generated. This allowed cassettes (gBlock Gene Fragments from IDT) containing various  
409 copyback genomes to be ligated using Gibson Assembly (NEBuilder HiFi DNA assembly, NEB).  
410 The deletion genome core plasmid was designed to contain *Eco* RV and *Stu* I restriction sites in  
411 the trailer and leader (GP) sequences, respectively. Similar to the copyback plasmids this allows  
412 various deletion genome cassettes to be easily ligated using Gibson Assembly. All plasmids  
413 described here were sequence verified using Sanger sequencing (Genewiz, USA).

414

415 Viruses rCDV<sup>RI</sup>, rCDV<sup>RI</sup>Venus(6), rCDV<sup>RI</sup>dTom(6), rCDV<sup>RI</sup>TagBFP(6), rCDV<sup>RI</sup>Gluc(6) and  
416 rCDV<sup>RI</sup>Venus(6)-LEGFP were rescued, grown and titrated in Vero-cCD150 cells by infecting cells  
417 with MVA-T7 for 1 h at 37°C. Inoculum was aspirated, and cells were transfected (Lipofectamine  
418 2000, Life Technologies) with pCG-CDV<sup>RI</sup>N, pCG-CDV<sup>RI</sup>P, pCG-CDV<sup>RI</sup>L and pCDV<sup>RI</sup>,  
419 pCDV<sup>RI</sup>Venus(6), pCDV<sup>RI</sup>dTom(6), pCDV<sup>RI</sup>TagBFP(6), pCDV<sup>RI</sup>Gluc(6) or rCDV<sup>RI</sup>Venus(6)-LEGFP.  
420 After 18 h the transfection mix was removed and replaced with complete growth medium. Cells  
421 were incubated for up to 5 – 7 days at 37°C with 5% (vol/vol) CO<sub>2</sub>. The presence of virus was  
422 confirmed by cytopathic effect observed by phase-contrast microscopy and fluorescent  
423 microscopy. Virus stocks were grown Vero-cCD150 cells and subjected to one freeze-thaw cycle  
424 and debris was removed by centrifugation at 3000 RPM for 10 minutes at 4°C. The cleared

*mSphere*: Tilston-Lunel *et al.*, submitted

425 supernatant (virus stock) was aliquoted and titrated in Vero cCD150 cells; calculated quantities,  
426 expressed in TCID<sub>50</sub> units were used to calculate M.O.I.s for infections.

427

#### 428 **Virus passage**

429

430 Vero-cCD150 cell monolayers at  $2 \times 10^5$  cells/ml in T25 flasks were infected with rCDV<sup>RI</sup>Venus(6),  
431 rCDV<sup>RI</sup>TagBFP(6), rCDV<sup>RI</sup>dTom(6) or rCDV<sup>RI</sup>Gluc(6) at an MOI of 0.05. At 72 hours post-  
432 infection, cells were scraped into culture medium and placed at - 80°C. After freeze-thawing the  
433 cells and medium, cell debris were clarified and 2 ml of this was used to infect fresh Vero-cCD150  
434 cells in a T25 flask and so on. Viral titers were determined as TCID<sub>50</sub>/ml for each passage. For  
435 the titrations, Vero-cCD150 cell monolayers in 96-well plates were infected with a 10-fold serial  
436 dilution of virus sample in OptiMEM. Cytopathic effect (CPE) was recorded about 5 – 7 days post  
437 infection and values were calculated by use of the Karber method.

438

#### 439 **Copyback genome identification by Sanger sequencing**

440

441 Total RNA was extracted using TRIzol LS reagent (ThermoFisher) according to manufacturer's  
442 recommendations and RNA pellet resuspended in 40 µl nuclease-free water (Invitrogen). cDNA  
443 was generated with 7 µl of resuspended RNA using SuperScript™ III First-strand synthesis  
444 system (Thermo Fisher Scientific), and primers A1 and A2 (Table 1) in a total volume of 20 µl. 2  
445 µl of the resultant cDNA was then amplified with primers for copyback genome (A1 and A2, Table  
446 1) and L gene amplification (A1 and B1, Table 1), using Phusion high-fidelity DNA polymerase  
447 (NEB) in a total volume of 50 µl (using a touch-down PCR amplification protocol). PCR products  
448 were analyzed on a 1% agarose gel and bands gel purified using QIAquick gel extraction kit  
449 (Qiagen). Samples were sequenced via Sanger sequencing (Genewiz, USA).

*mSphere*: Tilston-Lunel *et al.*, submitted

450

#### 451 **Defective genome identification by Illumina sequencing**

452

453 Total RNA was extracted using TRIzol LS reagent (ThermoFisher) according to manufacturer's  
454 recommendations. The RNA pellet was resuspended in 40 µl nuclease-free water (Invitrogen).  
455 Library preparation, rRNA depletion and sequencing was carried out according to manufacturer's  
456 recommendations for the MiniSeq system (Illumina). Illumina reads were trimmed of their adaptor  
457 sequences and quality checked using an in-house script, and then mapped to the appropriate  
458 reference genome with bwa-mem using default parameters (version 0.7.7). Using a modified  
459 version<sup>34</sup> of script chimeric\_reads.py v3.6.2<sup>43,44</sup> chimeric reads were identified amongst each  
460 dataset.

461

#### 462 **DIP rescue, production and quantification**

463

464 Vero-cCD150 cell monolayers in 6-well trays were infected with Fowlpox-T7 in Opti-MEM (Gibco)  
465 for 30 mins at 37°C and then spinoculated at room temperature for another 30 mins. Medium  
466 was then removed and cells transfected with 2 µg of defective genome-expressing plasmid, 0.6  
467 µg of pCG-CDV<sup>RI</sup>-N and 0.4 µg of pCG-CDV<sup>RI</sup>-L for 48 hours. Transfected cells were then  
468 superinfected with rCDV<sup>RI</sup>Venus(6)-LEGFP at MOI 0.001. Two days post infection cells were  
469 trypsinized and passaged into a T75 flask. Cells were harvested by free-thaw when CPE was  
470 visible. rCDV<sup>RI</sup>Venus(6)-LEGFP producer virus was inactivated from all DIP stocks at 60 mJ/cm<sup>2</sup>  
471 in 2 ml culture volume in a 6-well tray using a CX-2000 Crosslinker (UVP).

472

473 For quantification, total RNA was extracted using TRIzol LS reagent (ThermoFisher) according to  
474 manufacturer's recommendations and RNA pellet resuspended in 40 µl nuclease-free water

*mSphere*: Tilston-Lunel *et al.*, submitted

475 (Invitrogen). 3 µl of extracted RNA was used in a TaqMan one-step qRT/PCR assay (Luna®  
476 Universal One-Step RT-qPCR Kit, NEB). TaqMan analysis was carried out with primer/probe  
477 combination described in Table 1 and analysis performed on the QuantStudio™ 6 Flex System  
478 (ThermoFisher Scientific).

479

#### 480 **DI interference assay**

481

482 DIP stocks were split in half and UV irradiated to either inactivate the producer virus (60 mJ/cm<sup>2</sup>,  
483 active DIPs) or the DIPs (120 mJ/cm<sup>2</sup> (X8), inactive DIPs). UV irradiation was carried out in 2 ml  
484 in a 6-well tray using a CX-2000 Crosslinker (UVP). Vero-cCD150 cell monolayers in 24- or 96-  
485 well trays were infected with either active or inactive DIPs for 1 hour at 37°C and then  
486 superinfected with rCDV<sup>RI</sup> for 1 hour at 37°C. Supernatant was then removed and cells washed  
487 with phosphate buffered saline (PBS) 3X times. Fresh medium was added onto the cells and  
488 incubated for 48 hours. For crystal violet staining, cells were fixed in formalin for 15 mins and  
489 then stained with crystal violet for another 15 mins. Cells were washed with water and visualized.  
490 For virus titers, cells and medium were freeze-thawed at -80°C and TCID<sub>50</sub> carried out on Vero-  
491 cCD150 cells.

492

#### 493 **Animal study design**

494

495 The animal experiment described here was conducted in compliance with all applicable U.S.  
496 Federal policies and regulations and AAALAC International standards for the humane care and  
497 use of animals. All protocols were approved by the Boston University institutional animal care and  
498 use committee. Twelve 16-week old CDV-seronegative male ferrets (*Mustela putorius furo*) were  
499 housed in groups of three. The cages contained toys as a source of environmental enrichment.

*mSphere*: Tilston-Lunel *et al.*, submitted

500 Animals were intra-tracheally (IT) inoculated with  $10^4$  TCID<sub>50</sub> rCDV<sup>R1</sup>TagBFP(6). Nine ferrets,  
501 divided into groups of three were also inoculated with DIPs. One group was inoculated with DIPs  
502 6 hours prior to rCDV<sup>R1</sup>TagBFP(6). Inoculation was carried out with 2 ml of DIPs or medium and  
503 40 µl rCDV<sup>R1</sup>TagBFP(6) suspension. Animals were monitored several times per day and blood  
504 samples were collected every two days post inoculation in Vacuette tubes containing EDTA as  
505 an anticoagulant. Procedures were performed under light anesthesia (initial sedation with  
506 ketamine, medetomidine and butorphanol followed by maintenance with 1-5% isoflurane in  
507 oxygen and atipamazole reversal after handling). All animals were euthanized 14 days post  
508 inoculation and necropsies were performed.

509

#### 510 **Sample processing and analysis**

511

512 50 µl of blood sample was analyzed on a VetScan HM5 (Abaxis) to determine total white blood  
513 cell (WBC) and lymphocyte counts. Red blood cells (RBC) were then lysed using 1X multi-species  
514 RBC lysis buffer (eBioscience). WBC was washed in D-PBS and collected by centrifugation  
515 (350g, 10 minutes) and resuspended in 300 – 500 µl D-PBS. The resuspended WBC was used  
516 to determine total lymphocyte counts and infected WBC percentages by flow cytometry using a  
517 LSRII flow cytometer (BD LSR II, Biosciences). Virus isolation from WBC were performed on  
518 Vero-cCD150 cells by titrating the WBC in Opti-MEM.

519

520 Ferrets were euthanized by administration of an overdose of barbiturate anesthetic under deep  
521 sedation . Lymphoid tissues were collected during necropsy and placed in PBS for single-cell  
522 suspensions. Fatty tissue was removed from the lymphoid tissues before dissecting the tissues  
523 into smaller pieces to allow dissociation using gentleMACS™ dissociation (C) tubes (Miltenyi  
524 Biotec) in Advanced RPMI medium supplemented with 10% fetal calf serum, 1% Glutamax and

*mSphere*: Tilston-Lunel *et al.*, submitted

525 1X Antibiotic-Antimycotic (ThermoFisher Scientific). Samples were dissociated on a gentleMACS  
526 Dissociator (Miltenyi Biotec) using the m\_spleen\_C preset parameter. Samples were then passed  
527 through cell strainers with 100 µm pore size (Falcon™ Cell Strainers), washed in D-PBS and  
528 pelleted by centrifugation (350g, 10 minutes). Pellets were resuspended in an appropriate volume  
529 of D-PBS and analyzed by flow cytometry as described above.

530

### 531 **Acknowledgements**

532

533 We thank Shannon L.M. Whitmer and Jessica R. Harmon at the CDC for their help with NGS and  
534 bioinformatic analysis, and Claire Sharp (Tufts University) for providing clinical samples. This work  
535 was funded by the Defense Advanced Research Projects Agency (DARPA) INTERfering and Co-  
536 Evolving Prevention and Therapy (INTERCEPT) program (HR0011940493) and Boston  
537 University.

538

### 539 **References**

- 540 1. Manzoni, T. B. & López, C. B. Defective (interfering) viral genomes re-explored: Impact  
541 on antiviral immunity and virus persistence. *Future Virol.* **13**, 493–503 (2018).
- 542 2. Vignuzzi, M. & López, C. B. Defective viral genomes are key drivers of the virus–host  
543 interaction. *Nat. Microbiol.* **1** (2019). doi:10.1038/s41564-019-0465-y
- 544 3. Von Magnus, P. & Gard, S. Studies on Interference in Experimental Influenza. II.  
545 Purification and Centrifugation Experiments. *Ark. Kemi, Mineral. och Geol.* **24**, (1947).
- 546 4. Ziegler, J. E., Lavin, G. I. & Frank Horsfall, A. L. Interference between the influenza  
547 viruses: II The effect of virus rendered non-infective by ultraviolet radiation upon the  
548 multiplication of influenza viruses in the chick embryo. *J. Exp. Med.* **79**, 379–400 (1944).
- 549 5. Huang, A. S. & Baltimore, D. Defective Viral Particles and Viral Disease Processes.

*mSphere*: Tilston-Lunel *et al.*, submitted

- 550 *Nature* **226**, 325–327 (1970).
- 551 6. Whelan, S. P. J., Barr, J. N. & Wertz, G. W. Transcription and replication of  
552 nonsegmented negative-strand RNA viruses. *Current Topics in Microbiology and*  
553 *Immunology* **283**, 61–119 (2004).
- 554 7. Vasou, A., Sultanoglu, N., Goodbourn, S., Randall, R. E. & Kostrikis, L. G. Targeting  
555 Pattern Recognition Receptors (PRR) for Vaccine Adjuvantation: From Synthetic PRR  
556 Agonists to the Potential of Defective Interfering Particles of Viruses. (2017).  
557 doi:10.3390/v9070186
- 558 8. Dimmock, N. J. & Easton, A. J. Defective Interfering Influenza Virus RNAs: Time To  
559 Reevaluate Their Clinical Potential as Broad-Spectrum Antivirals? *J. Virol.* **88**, 5217–5227  
560 (2014).
- 561 9. Vasou, A., Sultanoglu, N., Goodbourn, S., Randall, R. E. & Kostrikis, L. G. Targeting  
562 Pattern Recognition Receptors (PRR) for Vaccine Adjuvantation: From Synthetic PRR  
563 Agonists to the Potential of Defective Interfering Particles of Viruses. *Viruses* **9**, (2017).
- 564 10. Dimmock, N. J. & Easton, A. J. Cloned defective interfering influenza RNA and a possible  
565 pan-specific treatment of respiratory virus diseases. *Viruses* **7**, 3768–3788 (2015).
- 566 11. Hackett, A. J. A possible morphologic basis for the autointerference phenomenon in  
567 Vesicular Stomatitis virus. *Virology* **24**, 51–9 (1964).
- 568 12. Huang, A. S. & Wagner, R. R. Defective T particles of vesicular stomatitis virus: II.  
569 Biologic role in homologous interference. *Virology* **30**, 173–181 (1966).
- 570 13. Johnston, M. D. The characteristics required for a Sendai virus preparation to induce high  
571 levels of interferon in human lymphoblastoid cells. *J. Gen. Virol.* **56**, 175–184 (1981).
- 572 14. Sun, Y. *et al.* Immunostimulatory Defective Viral Genomes from Respiratory Syncytial  
573 Virus Promote a Strong Innate Antiviral Response during Infection in Mice and Humans.  
574 *PLOS Pathog.* **11**, (2015).



*mSphere*: Tilston-Lunel *et al.*, submitted

- 575 15. Sun, Y. *et al.* A specific sequence in the genome of respiratory syncytial virus regulates  
576 the generation of copy-back defective viral genomes. *PLOS Pathog.* **15**, e1007707  
577 (2019).
- 578 16. Dimmock, N. J., Rainsford, E. W., Scott, P. D. & Marriott, A. C. Influenza Virus Protecting  
579 RNA: an Effective Prophylactic and Therapeutic Antiviral. *J. Virol.* **82**, 8570–8578 (2008).
- 580 17. Zhao, H. *et al.* Dual-functional peptide with defective interfering genes effectively protects  
581 mice against avian and seasonal influenza. *Nat. Commun.* **9**, (2018).
- 582 18. Meng, B. *et al.* Unexpected complexity in the interference activity of a cloned influenza  
583 defective interfering RNA. *Virol. J.* **14**, (2017).
- 584 19. Baum, A., Sachidanandam, R., Garcia-Sastre, A. & García-Sastre, A. Preference of RIG-I  
585 for short viral RNA molecules in infected cells revealed by next-generation sequencing.  
586 *Proc. Natl. Acad. Sci.* **108**, 3092 (2011).
- 587 20. Yount, J. S., Kraus, T. A., Horvath, C. M., Moran, T. M. & López, C. B. A Novel Role for  
588 Viral-Defective Interfering Particles in Enhancing Dendritic Cell Maturation. *J Immunol*  
589 *Ref.* **177**, 4503–4513 (2006).
- 590 21. Yount, J. S., Gitlin, L., Moran, T. M. & Lopez, C. B. MDA5 Participates in the Detection of  
591 Paramyxovirus Infection and Is Essential for the Early Activation of Dendritic Cells in  
592 Response to Sendai Virus Defective Interfering Particles. *J. Immunol.* **180**, 4910–4918  
593 (2008).
- 594 22. Fisher, D. G., Coppock, G. M. & López, C. B. Virus-derived immunostimulatory RNA  
595 induces type I IFN-dependent antibodies and T-cell responses during vaccination.  
596 *Vaccine* **36**, 4039–4045 (2018).
- 597 23. Sun, Y. *et al.* Immunostimulatory Defective Viral Genomes from Respiratory Syncytial  
598 Virus Promote a Strong Innate Antiviral Response during Infection in Mice and Humans.  
599 *PLOS Pathog.* **11**, (2015).

*mSphere*: Tilston-Lunel *et al.*, submitted

- 600 24. Vasilijevic, J. *et al.* Reduced accumulation of defective viral genomes contributes to  
601 severe outcome in influenza virus infected patients. *PLOS Pathog.* **13**, (2017).
- 602 25. Mercado-López, X. *et al.* Highly immunostimulatory RNA derived from a Sendai virus  
603 defective viral genome. *Vaccine* **31**, 5713–5721 (2013).
- 604 26. Easton, A. J. *et al.* A novel broad-spectrum treatment for respiratory virus infections:  
605 Influenza-based defective interfering virus provides protection against pneumovirus  
606 infection in vivo. *Vaccine* **29**, 2777–2784 (2011).
- 607 27. Sun, Y. & López, C. B. Preparation of Respiratory Syncytial Virus with High or Low  
608 Content of Defective Viral Particles and Their Purification from Viral Stocks Materials and  
609 Reagents. doi:10.21769/BioProtoc.1820
- 610 28. Dimmock, N. J. & Easton, A. J. Defective Interfering Influenza Virus RNAs: Time To  
611 Reevaluate Their Clinical Potential as Broad-Spectrum Antivirals? *J. Virol.* **88**, 5217–5227  
612 (2014).
- 613 29. Bdeir, N. *et al.* A system for production of defective interfering particles in the absence of  
614 infectious influenza A virus. *PLoS One* **14**, 1–18 (2019).
- 615 30. Sourimant, J. & Plemper, R. K. Organization, function, and therapeutic targeting of the  
616 morbillivirus RNA-dependent RNA polymerase complex. *Viruses* **8**, (2016).
- 617 31. Pfaller, C. K. *et al.* Measles Virus Defective Interfering RNAs Are Generated Frequently  
618 and Early in the Absence of C Protein and Can Be Destabilized by Adenosine Deaminase  
619 Acting on RNA-1-Like Hypermutations. *J. Virol.* **89**, 7735–47 (2015).
- 620 32. Duprex, W. P., Collins, F. M. & Rima, B. K. Modulating the Function of the Measles Virus  
621 RNA-Dependent RNA Polymerase by Insertion of Green Fluorescent Protein into the  
622 Open Reading Frame. *J. Virol.* **76**, 7322–7328 (2002).
- 623 33. Brown, D. D. *et al.* Rational Attenuation of a Morbillivirus by Modulating the Activity of the  
624 RNA-Dependent RNA Polymerase Downloaded from. *J. Virol.* **79**, 14330–14338 (2005).

*mSphere*: Tilston-Lunel *et al.*, submitted

- 625 34. Welch, S. R. *et al.* Inhibition of Nipah Virus by Defective Interfering Particles. *J. Infect.*  
626 *Dis.* **221**, S460–S470 (2020).
- 627 35. Pfaller, C. K., Radeke, M. J., Cattaneo, R. & Samuel, C. E. Measles Virus C Protein  
628 Impairs Production of Defective Copyback Double-Stranded Viral RNA and Activation of  
629 Protein Kinase R. *J. Virol.* **88**, 456–468 (2014).
- 630 36. Teresa S Anchez-Aparicio, M. *et al.* Loss of Sendai virus C protein leads to accumulation  
631 of RIG-I immunostimulatory defective interfering RNA. *J. Gen. Virol.* **98**, 1282–1293  
632 (2017).
- 633 37. Siering, O., Sawatsky, B. & Pfaller, C. K. C Protein Is Essential for Canine Distemper  
634 Virus Virulence and Pathogenicity in Ferrets. *J. Virol.* **95**, (2020).
- 635 38. Xu, J. *et al.* Replication defective viral genomes exploit a cellular pro-survival mechanism  
636 to establish paramyxovirus persistence. *Nat. Commun.* **8**, 799 (2017).
- 637 39. de Vries, R. D. *et al.* Delineating morbillivirus entry, dissemination and airborne  
638 transmission by studying in vivo competition of multicolor canine distemper viruses in  
639 ferrets. *PLoS Pathog.* **13**, e1006371 (2017).
- 640 40. Rütgen, B. C. *et al.* Establishment and characterization of a novel canine B-cell line  
641 derived from a spontaneously occurring diffuse large cell lymphoma. *Leuk. Res.* **34**, 932–  
642 938 (2010).
- 643 41. Lemon, K., Rima, B. K., McQuaid, S., Allen, I. V. & Duprex, W. P. The F Gene of Rodent  
644 Brain-Adapted Mumps Virus Is a Major Determinant of Neurovirulence. *J. Virol.* **81**, 8293–  
645 8302 (2007).
- 646 42. Cathomen, T., Buchholz, C. J., Spielhofer, P. & Cattaneo, R. Preferential Initiation at the  
647 Second AUG of the Measles Virus F mRNA: A Role for the Long Untranslated Region.  
648 *Virology* **214**, 628–632 (1995).
- 649 43. Whitmer, S. L. M. *et al.* Active Ebola Virus Replication and Heterogeneous Evolutionary

*mSphere*: Tilston-Lunel *et al.*, submitted

- 650 Rates in EVD Survivors. *Cell Rep.* **22**, 1159–1168 (2018).
- 651 44. Scripts/chimeric\_reads at master · jtladner/Scripts · GitHub. Available at:
- 652 [https://github.com/jtladner/Scripts/tree/master/chimeric\\_reads](https://github.com/jtladner/Scripts/tree/master/chimeric_reads). (Accessed: 1st January
- 653 2020)
- 654
- 655



*mSphere*: Tilston-Lunel *et al.*, submitted

657 **Figure 1.** Serial in vitro passage of rCDVRI. (A) rCDVRIVenus(6) was rescued, plaque picked  
658 and passaged once (P1) in Vero-cCD150 cells. Nine serial passages were carried out in a fixed  
659 volume (2 ml) in triplicate (A, B and C). (B) samples from each passage were titrated in Vero-  
660 cCD150 cells and represented as TCID<sub>50</sub>/ml. Error bars represent standard deviation (n=3). (C)  
661 RT/PCR was carried out on passages A, B and C. cbgenome-specific primers detected  
662 nDIRI07cb (length 720 nt) in B at P10. Part of L was amplified as a positive control for viral  
663 RNA. (D) rCDVRITagBFP(6), rCDVRIdTom(6) and rCDVRIGluc(6) were rescued, plaque picked  
664 and serially passaged 10 times in a fixed volume (2 ml) in Vero-cCD150 cells. (E) viral titers  
665 were determined as above. (F) RT/PCR using cbgenome-specific primers amplified different DI  
666 genomes for rCDVRITagBFP(6), rCDVRIdTom(6) and rCDVRIGluc(6) corresponding to lengths  
667 630 (nDIRI04cb), 690 (nDIRI11cb) and 1092 (nDIRI12cb) nts respectively. Viral RNA was  
668 confirmed in all samples by amplifying L.

669

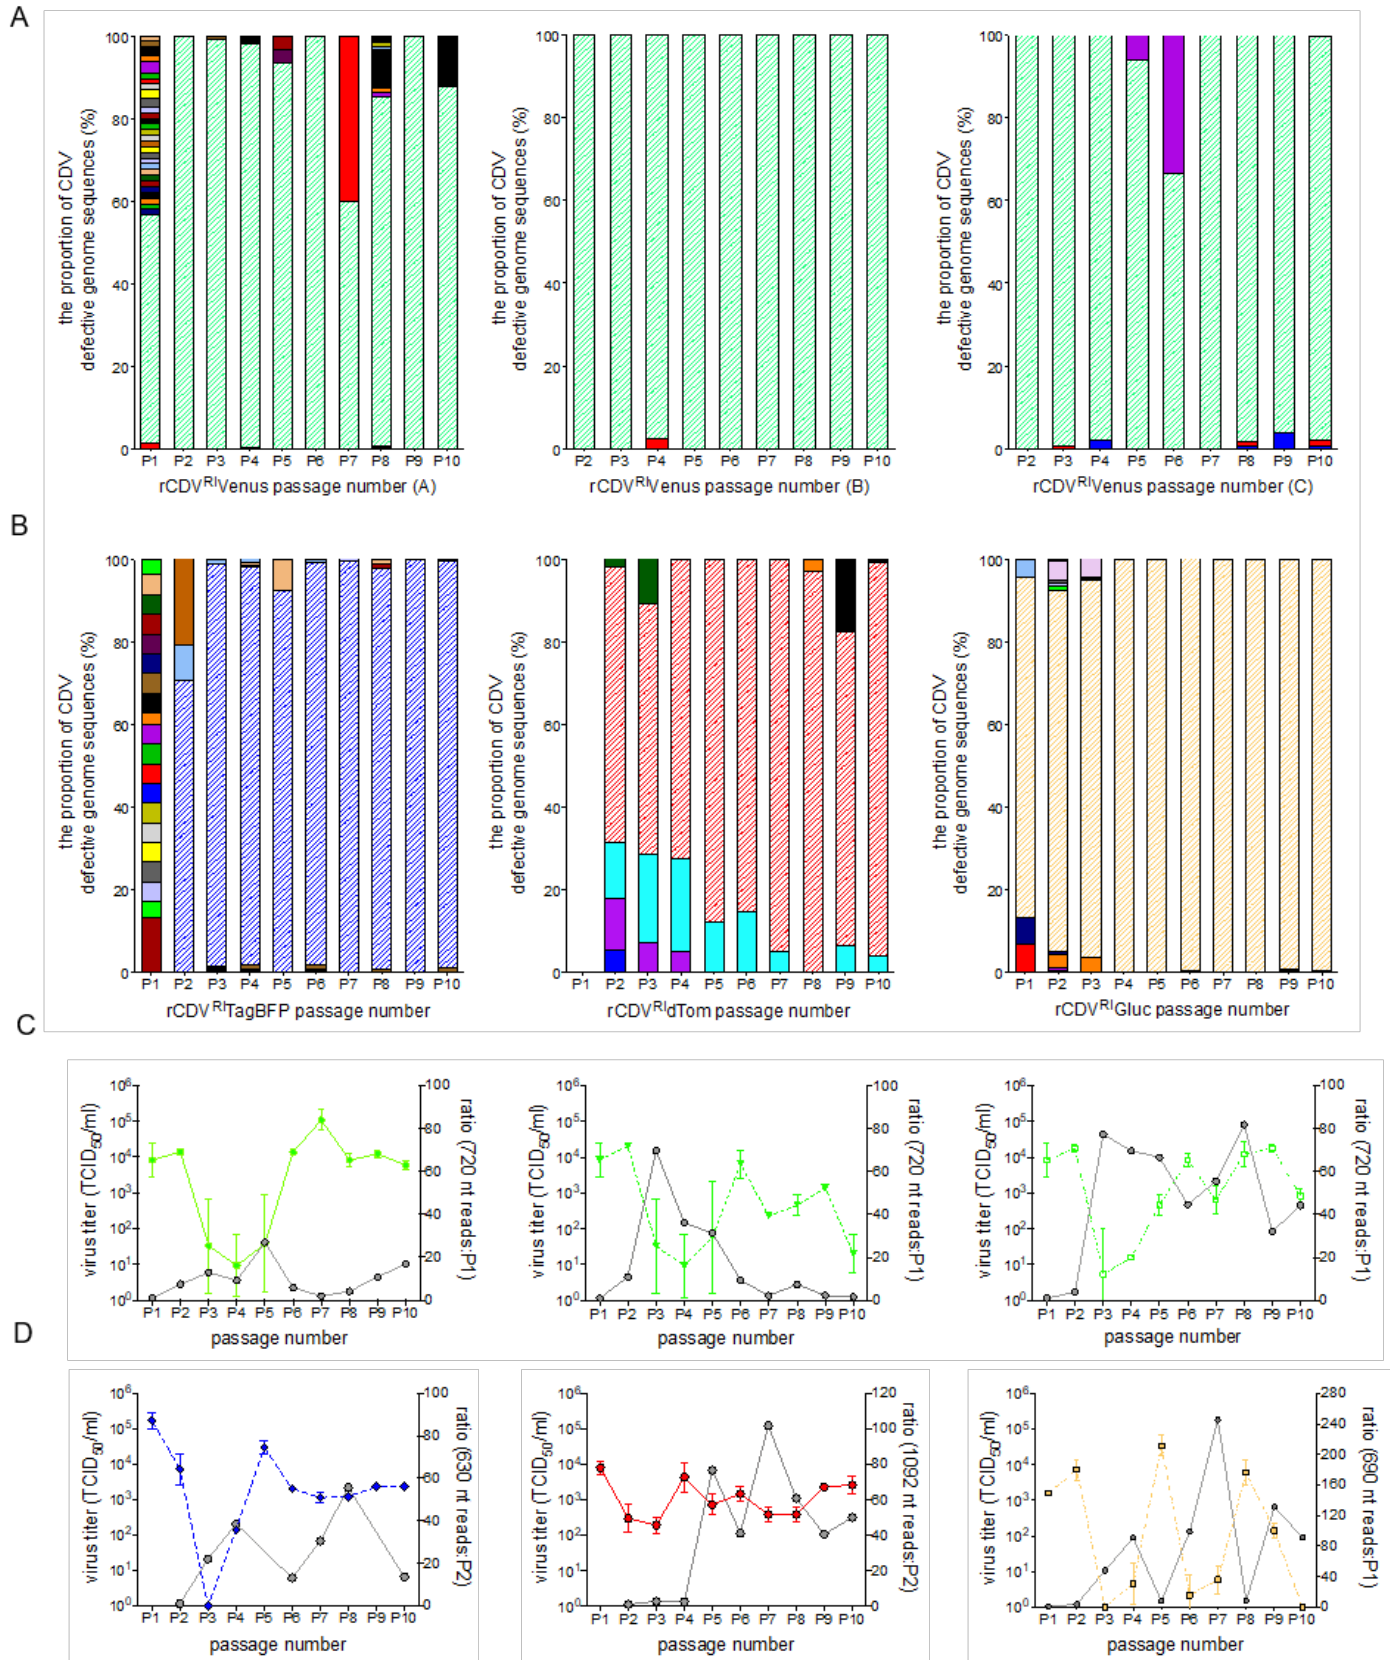

*mSphere*: Tilston-Lunel *et al.*, submitted

670 **Figure 2.** rCDV<sup>R1</sup> defective genomes at each passage. (A) and (B) the relative frequency of  
671 every CDV defective genome at the 10 passages. Each genome is represented by a different  
672 color. A read cut-off value of 1 was applied to eliminate sequence noise. (C) and (D) sequence  
673 reads for the predominant DI genome from (A) and (B) overlaid onto the viral titers from their  
674 corresponding passage experiment. Ratio of reads were calculated from when the predominant  
675 DI genome first appeared in passage. i.e., the diagonal striped areas in (A) and (B) represent  
676 the predominant DI genome.  
677



678

A

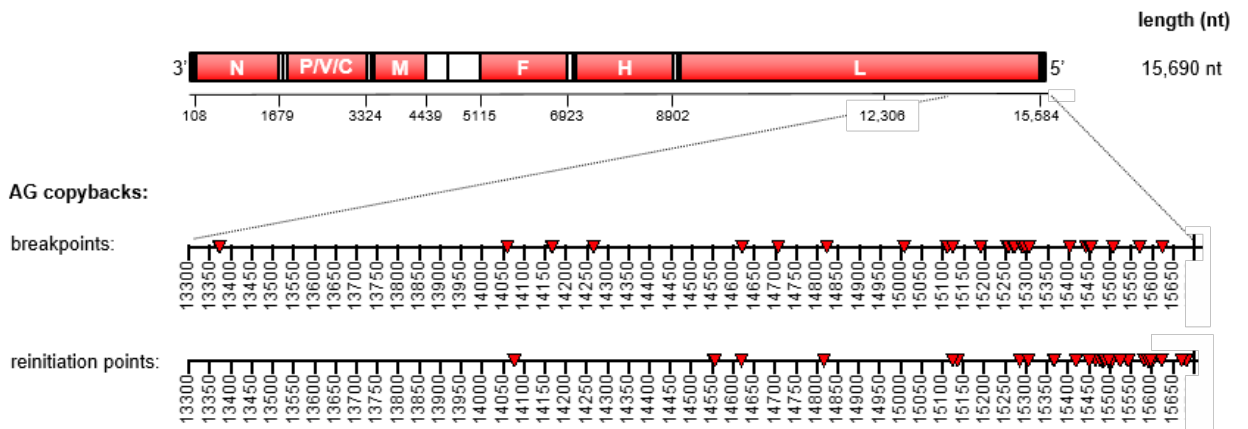

B

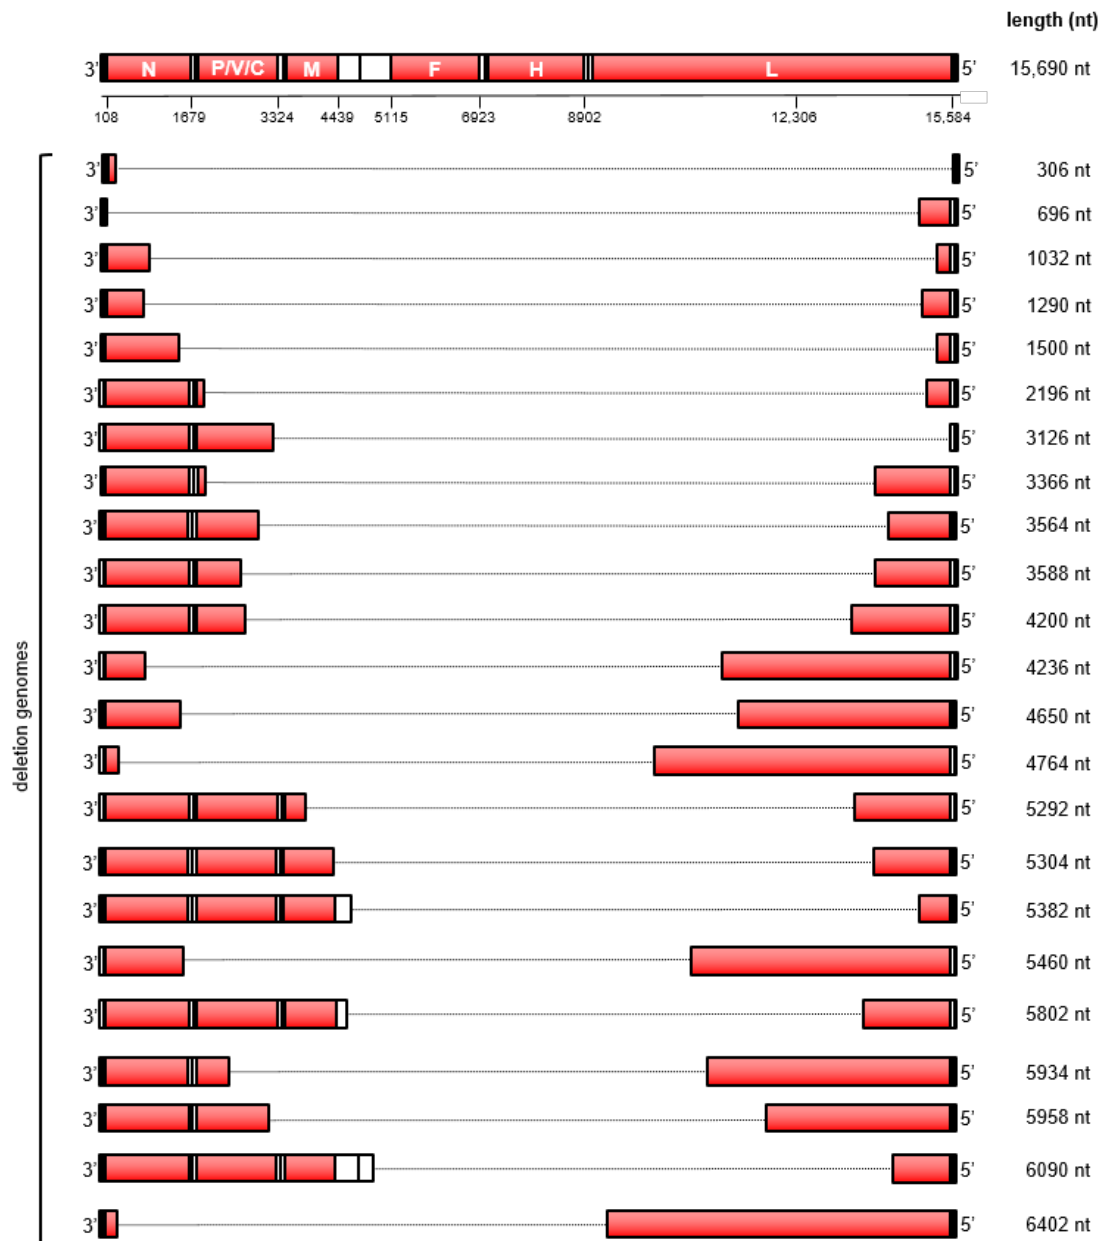

*mSphere*: Tilston-Lunel *et al.*, submitted

679 **Figure 3.** rCDV<sup>RI</sup> defective genome break and reinitiation points. (A) breakpoints and reinitiation  
680 points for AG copyback genomes identified in experiments (B) and (E) are plotted onto a scale  
681 illustrating their location on rCDV<sup>RI</sup>. (B). All rule-of-six compliant deletion genomes identified in  
682 experiments (B) and (E).

683

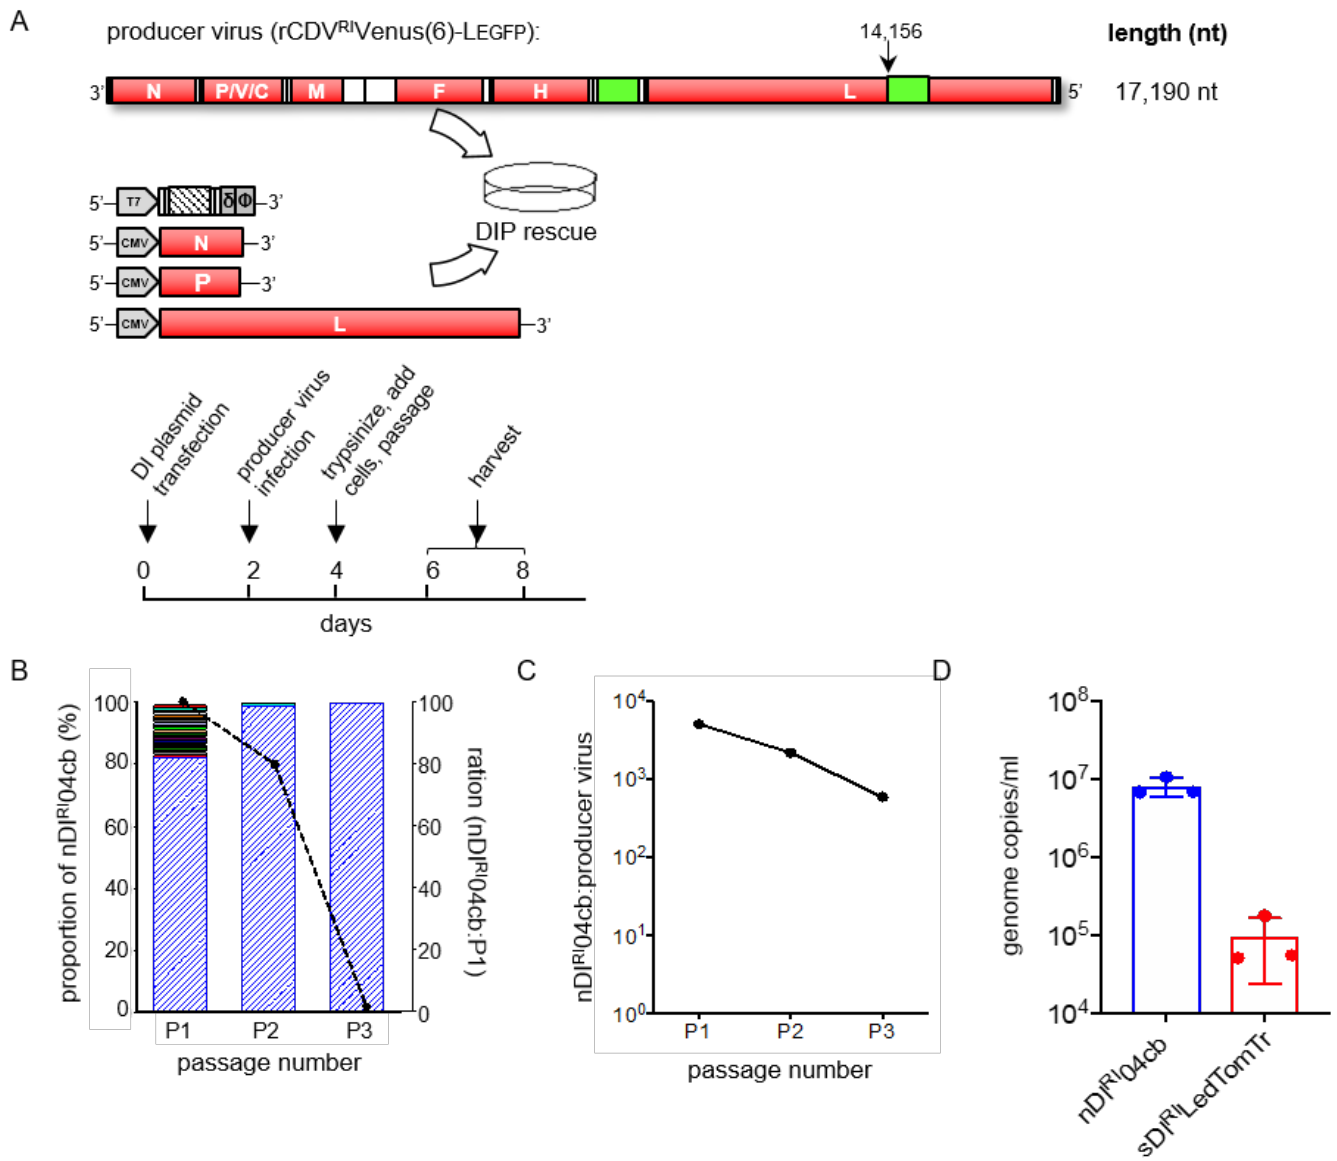

*mSphere*: Tilston-Lunel *et al.*, submitted

684 **Figure 4.** Production of rCDV<sup>RI</sup> DIPs using a recombinant producer virus. (A) experimental set-  
685 up of an rCDV<sup>RI</sup> DIP rescue. (B). frequency of rCDV<sup>RI</sup> defective genomes generated as shown in  
686 (A) using nDI<sup>RI</sup>04cb DIP. Rescued DIP stock still including the producer virus was passaged  
687 three times in Vero-cCD150 cells. Blue bars represent the predominant nDI<sup>RI</sup>04cb. The overlaid  
688 line graph represents sequence reads for the three passages. (C). qRT-PCR for (B) shows the  
689 ratio of DI/full-length genome at three passages. (D). controlling DIP production. qRT-PCR for a  
690 passage 2 experiment where a determined ratio of DI/full-length was supplied from passage  
691 one. The experiment was performed in triplicate. Error bars represent standard deviation of  
692 titers (n=3).  
693

694

A

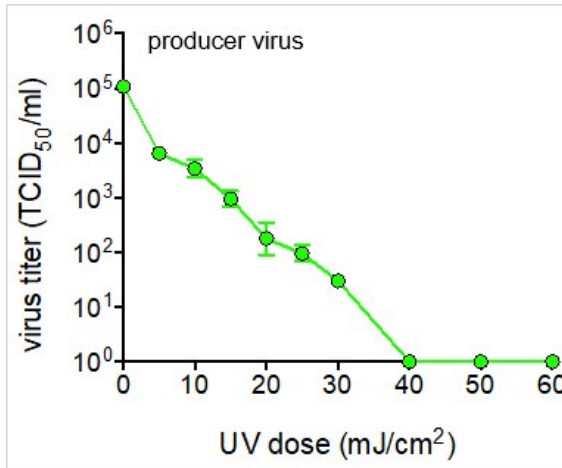

B

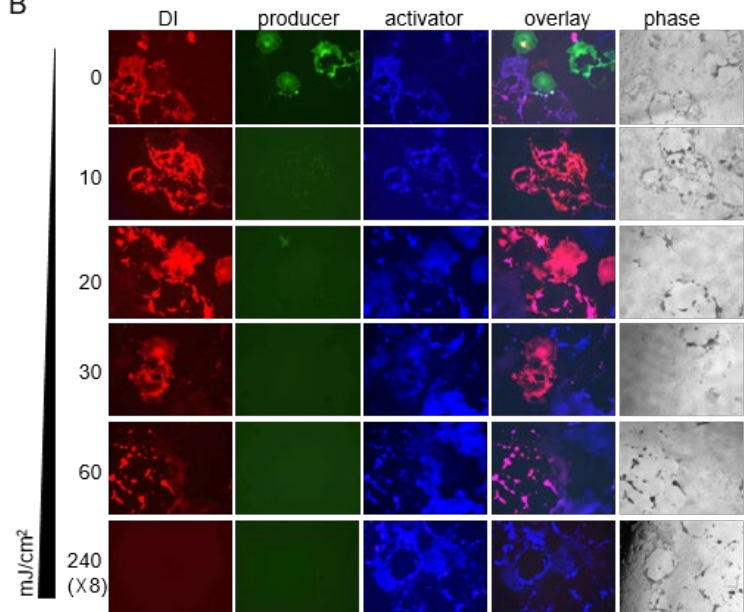

C

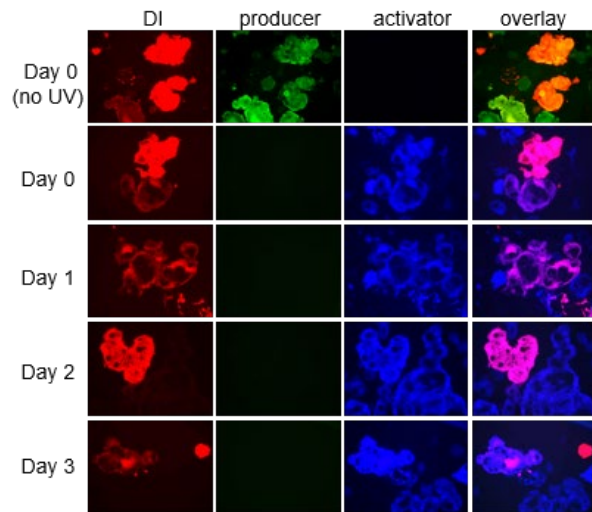

D

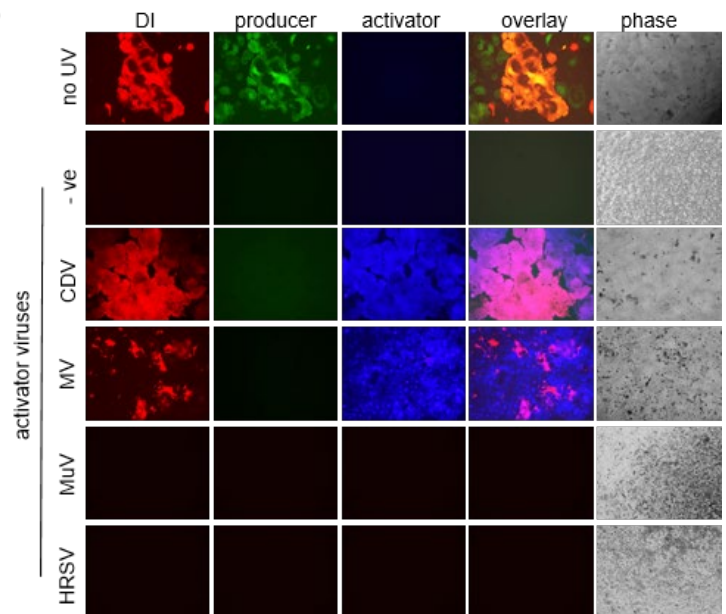

*mSphere*: Tilston-Lunel *et al.*, submitted

695 **Figure 5.** UV inactivation of “producer” virus and activation of DI with “activator” virus. (A) the  
696 effect of various UV dosages on rCDV<sup>RI</sup> “producer” virus titers. Samples were irradiated using  
697 an UV crosslinker (CX-2000 Crosslinker, UVP) and TCID<sub>50</sub>/ml determined. (B) UV doses were  
698 tested in the presence of a DI genome (red) empirically to determine required amount to  
699 inactivate rCDV<sup>RI</sup> producer virus and not the DI genome. Vero-cCD150 cells infected with UV-  
700 treated samples were superinfected with rCDV<sup>RI</sup>TagBFP “activator” virus, in order to drive the  
701 replication of the DI in the samples. (C) stability of the DI genome in infected cells were tested.  
702 DI genomes remained ‘dormant’ in cells for up to three days as shown by genome activation  
703 with rCDV<sup>RI</sup>. (D) activation of rCDV<sup>RI</sup> DI genome using various paramyxoviruses as “activator”  
704 virus. Cross reactivity of rCDV<sup>RI</sup> DIP was tested against other paramyxoviruses measles virus  
705 (MV), mumps virus (MuV) or human respiratory syncytial virus (HRSV). Activation of a rCDV<sup>RI</sup>  
706 DI genome only occurred with CDV and MV, both morbilliviruses.  
707



*mSphere*: Tilston-Lunel *et al.*, submitted

709 **Figure 6.** DIP interference on rCDV<sup>RI</sup> infection *in vitro*. (A) copyback nDIs 07, 04, 10 and 11  
710 (Table 2) and deletion DIP sDI<sup>RI</sup>LedTomTr were tested for their ability to interfere with rCDV<sup>RI</sup>  
711 replication *in vitro*. The amount of inhibition to rCDV<sup>RI</sup> infection in Vero-cCD150 cells is  
712 visualized by cytopathic effect (CPE) (cell monolayers stained by crystal violet. N=neat,  
713 undiluted DIP stock). (B) dose response curve for copyback nDI<sup>RI</sup>04cb. To obtain a dose at  
714 which a DIP completely eliminates CDV infection Vero-cCD150 cells were treated with specific  
715 ratios virus and DIPs (green line). Control infections were performed using UV-inactivated DIPs  
716 (red line) to demonstrate interfering effects were DI genome replication specific. rCDV<sup>RI</sup> titers  
717 were measured by TCID<sub>50</sub>/ml at 72 h.p.i.

718



719

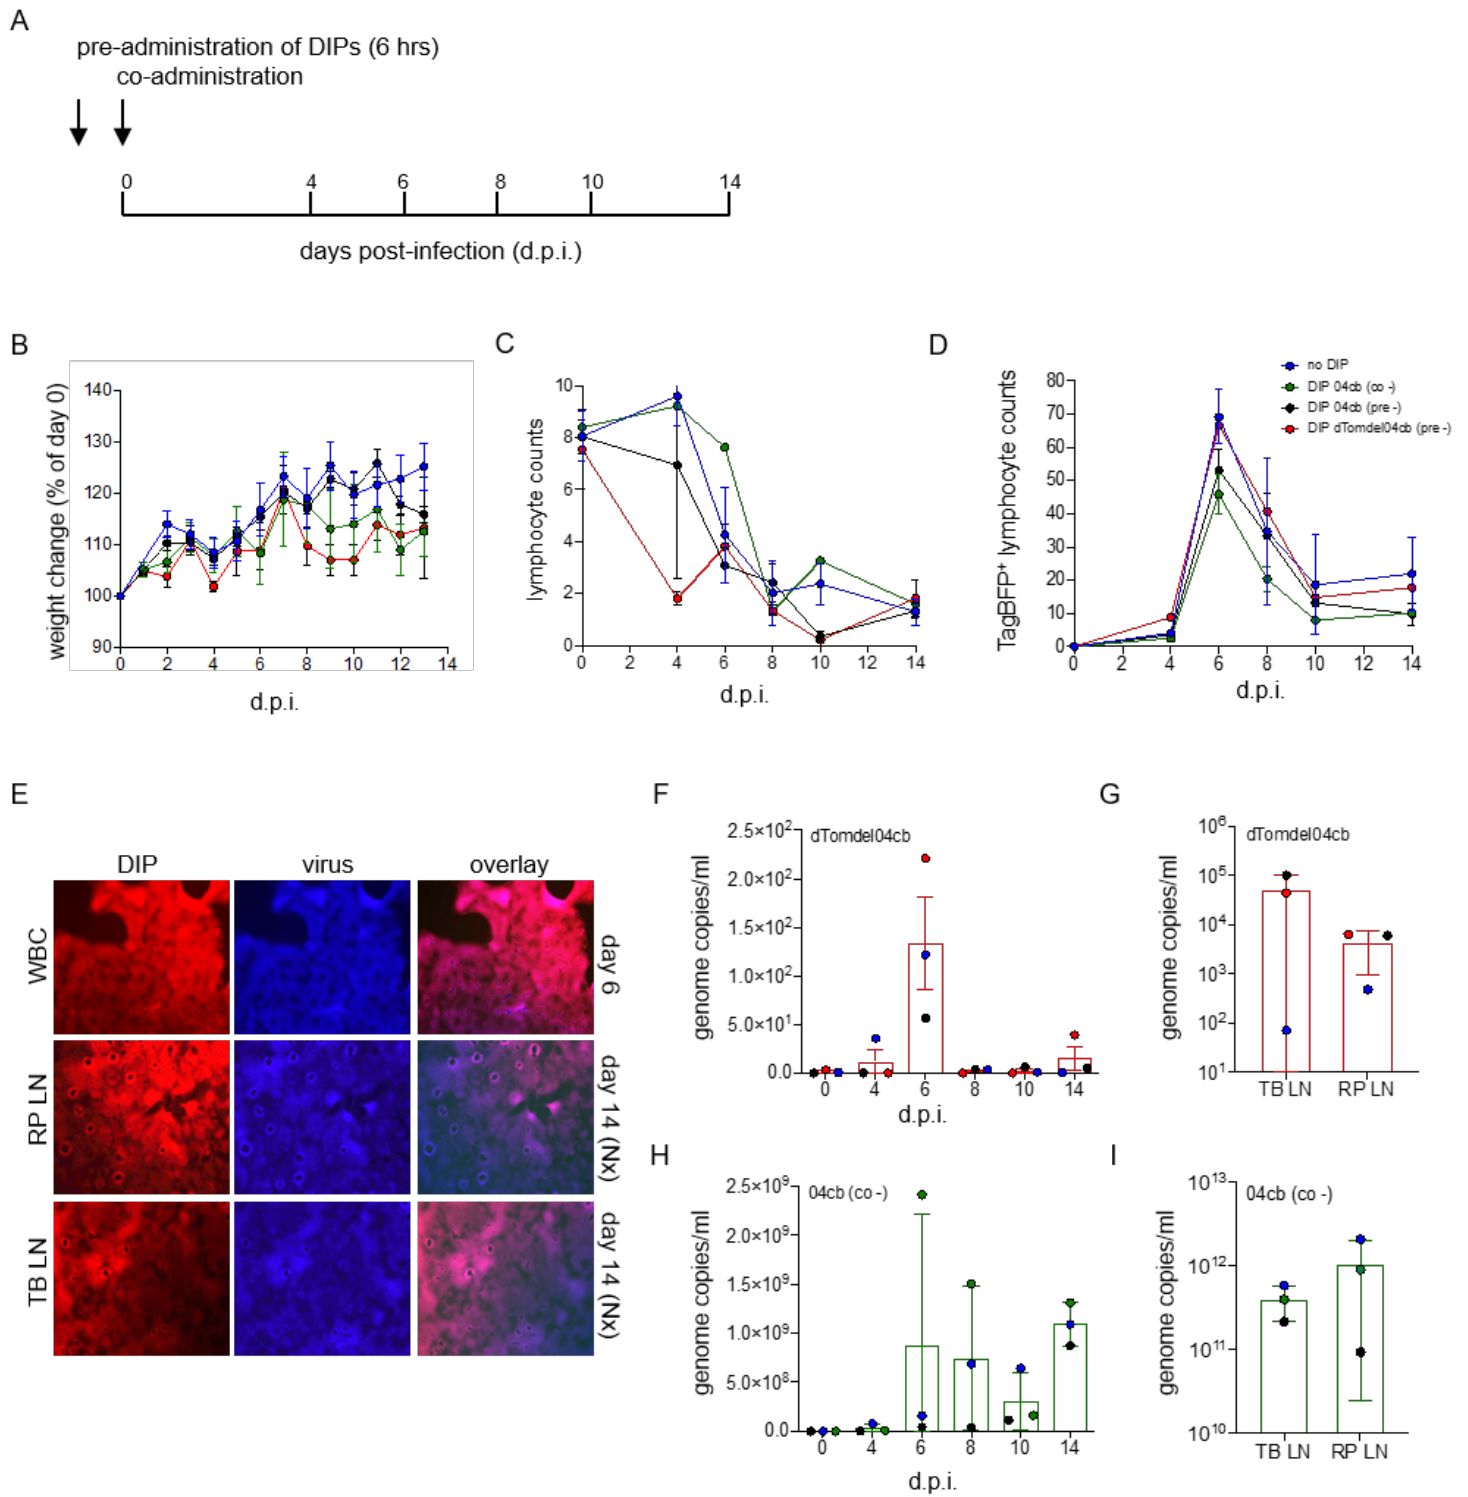

*mSphere*: Tilston-Lunel *et al.*, submitted

720 **Figure 7.** rCDV<sup>RI</sup> infection in ferrets. (A) experimental outline of ferret infection. Ferrets were  
721 either pre- or co- infected with DIP nDI<sup>RI</sup>04cb, pre-inoculated with sDI<sup>RI</sup>dTomdel04cb, or culture  
722 medium prior to infection with the challenge virus rCDV<sup>RI</sup>TagBFP. Pre-administration was  
723 carried out 6 hours before infection.(B) weight change of ferrets during the course of infection.  
724 (C) lymphocyte counts in EDTA blood determined by flow cytometry shows lymphopenia. (D)  
725 virus infection in lymphocytes was determined for each time point by monitoring fluorescence  
726 using flow cytometry. Peak in infection is seen at day 6. (E) sDI<sup>RI</sup>dTom04cb and virus were  
727 isolated from WBC (6 d.p.i.) and from lymph nodes (14 d.p.i.) from ferrets. TB-LN, tracheol-  
728 bronchial lymph node; RP-LN, retropharyngeal lymph node. (F) and (G) sDI<sup>RI</sup>dTom04cb  
729 genome copies were detected in WBCs at each time point during the course of the infection and  
730 at necropsy in single cell suspensions of lymphoid tissues. (H) and (I) nDI<sup>RI</sup>04cb genome copies  
731 were detected in WBCs at each time point during the course of the infection and at necropsy in  
732 lymphoid tissues.
